# Supplementary material for: Tong-Xie-Yao-Fang Regulates 5-HT Level in Diarrhea Predominant Irritable Bowel Syndrome Through Gut Microbiota Modulation
Source: PubMed Central journal article supplement (PMC6172324; doi:10.3389/fphar.2018.01110), 2018-09-28
Supplement: Image_1.pdf [file Image_1.pdf]

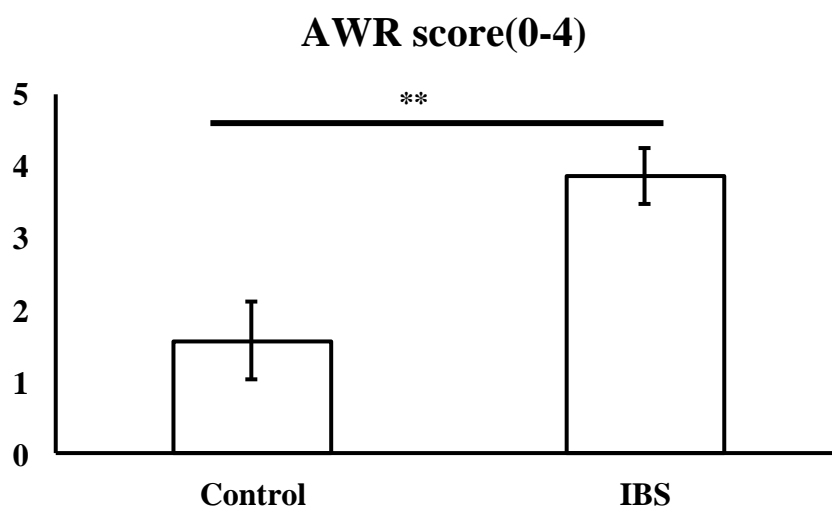

**sFig. 1:** The AWR score of the IBS group was significantly higher than that of the control group.

Control; IBS (n=10 per group)

Data are presented as mean  $\pm$  SD. \*:  $p < 0.05$ , \*\*:  $p < 0.01$ .
